# Supplementary material for: Bladder Tumor Subtype Commitment Occurs in Carcinoma In Situ Driven by Key Signaling Pathways Including ECM Remodeling
Source: Oxford University Press journal article supplement (doi:10.1158/0008-5472.can-20-2336), 2021-01-20
Supplement: 00085472can202336-sup-247069_2_supp_6822699_qmgxyg.xlsx [file 00085472can202336-sup-247069_2_supp_6822699_qmgxyg.xlsx]

## Sheet: Luminal- and basal-ness scores
Supplementary Table 3. Genes and proteins used for calculation of gene- and protein-expression scores (luminal-ness/basal-ness/ECM/EMT/signature scores).
Luminal-ness	Basal-ness
Gene-Scores	Gene-Scores
CYP2J2	CD44
ERBB2	KRT5
ERBB3	KRT6A
FGFR3	KRT6B
GATA3	KRT6C
KRT7	SNAI2
KRT20
Protein-Scores	Protein-Scores
CK20	CD44
FOXA1	CK5/6
GATA3	CK14
UPKII

## Sheet: ECM- and EMT-Score
ECM-Score	EMT-Score
ACTG2	SNAI2
CD44	VIM
CNN1	ZEB2
MFAP4
MYH11

## Sheet: PanCancer Progression Panel
Angiogenesis Response	Basement Membrane Remodeling	Blood Coagulation	Carbon Metabolism	Cell Adhesion	Cell Cycle – Downregulation in Carcinoma	Cell Cycle – Upregulation in Carcinoma	Cell Motility	Cell Proliferation – Downregulation in Carcinoma	Cell Proliferation – Upregulation in Carcinoma	Cellular Differentiation	Cellular Growth Factors – Downregulation in Carcinoma	Cellular Growth Factors – Upregulation in Carcinoma	Choline Metabolism	Collagen Family	ERBB-Signaling	Extracellular Matrix (ECM) Receptor Interaction	Extracellular Matrix (ECM) Structure	Epithelial to Mesenchymal Transition (EMT) – Downregulation in Carcinoma	Epithelial to Mesenchymal Transition (EMT) – Upregulation in Carcinoma	FGFR-Signaling	Fibrosis	General Regulation of Angiogenesis	HIF-1-Alpha-Signaling – Downregulation in Carcinoma	HIF-1-Alpha-Signaling – Upregulation in Carcinoma	Lysyl Oxidase (LOX) Remodeling	Metastasis Suppressors	Matrix Metalloproteinase (MMP) Remodeling	Negative Regulation of Angiogenesis	Plasma Membrane – Downregulation in Carcinoma	Plasma Membrane – Upregulation in Carcinoma	Positive Regulation of Angiogenesis	Sprouting Angiogenesis	Stem Cell Associated Genes	TGF-Beta-Signaling	Vasculogenesis	VEGF-A-Signaling
AAMP	ACHE	ADRA2B	AKT1	ACHE	ACVR1	CD2AP	CALD1	ACHE	ACVRL1	ACVR1	ACVR1	ACVRL1	AKT1	ABI3BP	AKT2	AGRN	ABI3BP	ADAP1	ADAM15	FGF2	AGT	CTNNB1	AKT2	ANGPT1	CLDN1	AKAP12	ADAM15	AGT	AAMP	ADAM15	ACVRL1	ACVRL1	ALB	ACVR1	ADRA2B	AKT1
ACVRL1	ADAMTS1	ALB	AKT2	ADAM15	CAMK2D	EIF4EBP1	EGFR	ADAMTS1	ADAM17	ADAM15	ACVR1C	ADAM17	AKT2	ACHE	AKT3	CD36	ADAMTS8	AGR2	AP1M2	FGF9	BMP7	EPHA2	AKT3	ANGPT2	FGF2	ARHGDIB	ADAM17	ANGPT2	ACHE	ADAM17	ADD1	ANGPT1	ANPEP	ACVR1C	AGGF1	AKT2
ADAM15	AGRN	ALDOA	AKT3	ADAM17	CDK14	FOXO4	FN1	ADAMTS8	ATPIF1	ADAM8	ADRA2B	AGT	AKT3	ADAM15	CASP8	CD44	AEBP1	AHNAK	CBLC	FGFR1	CCL11	ERBB2	ALDOA	CREBBP	HIF1A	BRMS1	ADAM28	BAI3	ACVR1	ADAM8	ADM2	BMP4	APOE	ACVRL1	AGT	AKT3
ADAM8	ALB	ANGPT2	EGFR	ADAM8	CDKN1A	ID4	ITGB1	AGGF1	BMPR1A	ADAMTS1	APOD	AMH	EGFR	ANXA2P2	CAV1	CHAD	AGRN	AKAP12	CD24	FGFR2	GREM1	FGF2	CAMK2D	EIF4EBP1	ITGA3	CADM1	ADAM8	CCR2	ACVR1C	ADAP1	AGGF1	BMPER	BMP4	AMH	ANGPT1	BAD
ADM2	ANG	CD34	ERBB2	AEBP1	CIB1	LLGL2	ITGB4	AKT1	BRMS1	ADD1	AREG	BAD	EIF4EBP1	CD44	CDH1	COL1A1	ANXA2P2	AKAP2	CD2AP	FGFR3	HGF	GPR124	CDKN1A	ENO1	LAMA5	CASP8	ADAMTS1	COL4A2	ADAM28	AGRN	ANGPT2	CDC42	BMP7	BMP4	C3	CDC42
ADRA2B	ANXA2P2	CD36	FGFR1	AGGF1	CUL1	MAP2K1	JAG1	ANG	CALCRL	AEBP1	BMP4	CADM1	HIF1A	COL18A1	CTNNB1	COL1A2	APOE	AKT3	CDH1	FGFR4	IL13RA2	HMOX1	CYBB	ENO2	LLGL2	CD44	ADAMTS8	CXCL10	ADD1	ANXA2P2	ANGPTL4	CDH13	BMPR1A	BMP5	C3AR1	CHP1
AGGF1	CCDC80	CLU	FGFR2	ANGPT1	DLG1	MTBP	PDGFRB	APC	CD24	AGGF1	BMP5	CBLC	HRAS	COL1A1	DAG1	COL3A1	BGN	ALOX5	CDS1	HRAS	SNAI1	ID1	EDN1	ERBB2	LOX	CD82	CASP8	CXCR3	ADRA2B	APOE	AQP1	EPHB4	BMPR2	BMP7	CCR2	CHP2
ANG	CEP295	COL1A1	FGFR3	APOD	DST	PPP2R1A	PKN1	APOD	COL18A1	AKT1	BMP7	CD24	JUN	COL1A2	EGFR	COL4A1	BMP7	ANGPTL2	CKMT1A	KRAS		IL6	EGFR	FLT1	LOXL2	CDH1	CD44	DLL4	AKAP12	CADM1	BTG1	FGF2	CAV1	BMPR1A	CD34	HRAS
ANGPT1	COL18A1	COL1A2	HIF1A	ARHGDIB	ERBB2IP	PTTG1	RAC1	APOE	CTNNB1	ALDOA	BMPR1A	CHAD	KRAS	COL3A1	ERBB2	COL4A2	CCL21	ARAP2	CLDN4	MAPK1		NF1	EGLN2	HMOX1	MAPK1	CDH11	CDH1	FASLG	AKT1	CD24	C3	FLT1	CCR2	BMPR2	COL1A1	HSPB1
ANGPT2	COL4A1	CXADR	HK2	BMP7	FGFR1	RB1	ROCK1	AREG	CUL1	ANXA2P2	BMPR2	COL4A1	MAP2K1	COL4A1	ERBB3	COL4A6	CFP	AREG	CLDN7	MAPK3		PLXND1	EGLN3	MAP2K1	MMP2	DLC1	CMA1	FOXO4	AKT2	CD2AP	C3AR1	FLT4	CD163	COMP	COL1A2	KDR
ANGPTL4	COL5A1	F11R	HRAS	CADM1	FHL1	SMC3	SORD	BMP4	ENPEP	BMP7	BTG1	COL4A2	MAP2K2	COL4A2	EREG	COL5A1	CLEC3B	ARHGAP32	CTNNB1	PIK3CA		RNH1	EIF4E2	MAP2K2	MMP9	DPYSL3	CXCL11	GTF2I	AKT3	CDS1	CCL11	GPR124	CD34	CREBBP	COL3A1	KRAS
ANPEP	COL7A1	F3	KRAS	CAV1	HRAS	SOX2	SRPX2	BMP7	EPCAM	C3AR1	C3	EGLN2	MAPK1	COL4A6	HRAS	COL5A2	CLU	ARHGDIB	CYB561	PIK3R1		SFRP1	EP300	MAPK1	PDGFA	GSN	MMP1	HDAC5	ANGPT2	CLDN7	CD34	GREM1	CD36	CUL1	COL5A1	MAP2K1
ANXA2P2	DAG1	FBLN5	MAP2K1	CCL11	ILK	TCF3	STAT3	BMPER	EPHA1	CAMK2D	C3AR1	ENO1	MAPK3	COL5A1	ILK	COL6A1	CMA1	B3GNT3	DSC2	PLCG1		TNFRSF12A	HIF1A	MAPK3	PTK2	HUNK	MMP14	HOXA5	ANPEP	CYB561	CHI3L1	ITGB1	CD44	DCN	CX3CL1	MAP2K2
APOD	DLG1	FN1	MAP2K2	CCL21	INHBA	TFDP1	TACSTD2	BMPR2	ERBB2	CCL21	CAMK2D	ERBB2	MTOR	COL5A2	JUN	COL6A2	COL18A1	BAG2	EPCAM	PPP2CB		WARS	HK2	MTOR	SMAD2	KDM1A	MMP2	ITGB1BP1	AQP1	DAG1	CHRNA7	ITGB1BP1	CDH1	EP300	CYP1B1	MAPK1
ATPIF1	DST	HGF	MAPK3	CCL5	IRF6	TP53	TGFB1	BTG1	ERBB3	CD44	CCR2	ERBB3	PDGFA	COL6A1	KRAS	COL6A3	COL1A1	BCAS1	EPHA1	PPP2R1A			IGF1	NOS2	SMAD3	KISS1	MMP3	KLK3	AREG	DLL4	CIB1	KDR	CEACAM1	FST	EGFL7	MAPK3
CALCRL	ERBB2IP	HPSE	MET	CD24	ITGB1		VIM	CAV1	EREG	CIB1	CDH13	EREG	PDGFC	COL6A2	MAP2K1	COMP	COL1A2	BGN	EPN3	SRC			IL6	NOS3	SNAI1	LIFR	MMP9	KRIT1	ARHGAP32	DSC2	CMA1	LOXL2	CEACAM5	ID1	EPHA2	MAPKAPK3
CASP8	FBLN1	HRAS	MTOR	CD34	MAPK1			CCL11	ETV4	CMA1	CLEC3B	FLT1	PDGFRB	COL6A3	MAP2K2	DAG1	COL3A1	BICC1	ERBB2	UBA52			LDHA	PDK1	TGFB1	MAP2K4	PLAU	MEG3	B3GNT3	EPCAM	CTSH	NOTCH1	CEACAM6	ID2	FGF9	NFAT5
CAV1	FBN1	IGF1	MYC	CD36	MAPK3			CD34	FLT1	COL3A1	COL1A2	FLT4	PIK3CA	COL7A1	MAP2K4	FN1	COL4A1	BMP7	ERBB3				NFKB1	PFKFB4	TIMP1	MED23	PRSS22	MMRN2	BAI3	EPHA1	CX3CL1	NR4A1	CTNNB1	ID4	FLT1	NFATC2
CEACAM1	FGF9	ITGA2	PDGFRB	CD44	MUC1			CDH13	FLT4	COL5A2	COL3A1	FOXO4	PIK3CD	COMP	MAPK1	HSPG2	COL4A2	C1S	ESRP1				PFKFB1	PGK1		MTBP	PRSS8	NF1	BMPR1A	EPHB4	CXCR3	NRP1	CXCR3	INHBA	FLT4	NOS3
CIB1	FN1	ITGA3	PDK1	CDH1	MYC			CDKN1A	FOXO4	CTNNB1	COL5A1	GDF15	PIK3R1	CSPG4	MAPK3	ITGA1	COL5A1	CALD1	EVPL				PIK3CD	PIK3CA		NDRG1	SERPINA1	NOTCH1	BMPR2	ERBB2	CYP1B1	PTK2B	CXCR4	INHBE	GATA4	PIK3CA
CLIC4	FREM1	ITGA5	PIK3CA	CDH11	NR4A3			CHRNA7	HGF	CTSG	COL6A1	GPI	PIK3R2	DCN	MMP2	ITGA11	COL5A2	CAV1	FBLN1				PIK3CG	PIK3R2		NME1	SERPINE1	NPR1	C3AR1	ERBB3	ECM1	RAMP2	EPCAM	MAPK1	GJA5	PIK3CD
COL18A1	FREM2	ITGA6	PIK3CD	CDH13	OVOL2			CIB1	HMOX1	CUL1	CX3CL1	HGF	PIK3R5	DDR2	MMP9	ITGA2	COL6A1	CCL8	FBP1				PIK3R1	PLCG2		TIMP1	SERPINH1	PDCD10	CALCRL	ESRP1	EPHA1	SEMA3E	EPHB4	MAPK3	GPX1	PIK3CG
COL4A2	HSPG2	ITGAM	PIK3CG	CEACAM1	PDPN			CLU	ID4	CXCR2	CXCL12	HIPK2	PLCG1	DPT	MTOR	ITGA3	COL6A2	CD163	GDF15				PIK3R5	RBX1		TIMP2	TIMP1	PTPRM	CALD1	FREM2	F3	SLIT2	FGFR2	MYC	HEG1	PIK3R1
CSPG4	ITGA6	ITGB1	PIK3R1	CIB1	RBL1			CRIP2	IGFBP7	CXCR3	EDN1	HRAS	PRKCB	ECM2	MUC1	ITGA5	COL6A3	CD44	GLYR1				PLCG1	RPS6KB2		TIMP4	TIMP2	RGCC	CAMK2D	FUT3	FGF2	SRF	FGFR4	PITX2	HIF1A	PIK3R2
CX3CL1	ITGB1	ITGB2	PIK3R2	CLDN1	RBL2			CTSH	IL11	DENR	EGFR	IGFBP7	RAC1	EMILIN1	NFKB1	ITGA6	COL7A1	CD46	GREM1				PRKCB	TCEB1		TXNIP	TIMP4	ROCK1	CAV1	GPI	FLT1	TDGF1	GATA4	PPP2CB	HPSE	PIK3R5
CXCL17	ITGB4	ITGB3	PIK3R5	CLDN3	RPS27A			CX3CL1	IL1A	DLC1	EMP3	IL11	RAC2	FN1	PIK3CA	ITGA7	COMP	CDH11	GRHL2				SERPINE1	TCEB2			TMPRSS2	ROCK2	CCR2	HSP90B1	GATA4	TEK	ICAM1	PPP2R1A	ID1	PLA2G10
CXCL8	LAD1	JAM2	PKM	CLDN4	RPS6KB1			CXCL10	INHBA	DLG1	ERBB2IP	IL1A	RAF1	HIF1A	PIK3CD	ITGA8	CRIP2	CDK14	IL1RN				SLC2A1	VHL			TMPRSS4	SEMA3E	CD163	HSPG2	HGF	THBS1	ID2	RBL1	IL1A	PLA2G2A
CXCR3	LAMA3	KDM1A	PTEN	CLDN7	SKP1			CXCL12	ITGB1	EGFR	F3	INHBA	RPS6KB1	HSD17B12	PIK3R1	ITGA9	CRISPLD2	CEACAM1	KRT7				STAT3	VEGFB			TNF	SERPINF1	CD34	ITGA7	HIF1A	VEGFA	INHBA	RBL2	IL1B	PLCG1
CYP1B1	LAMA4	KRAS	RAF1	COL18A1	SRC			CXCR2	KDR	EIF4E2	FBP1	ITGA5	RPS6KB2	ID1	PIK3R2	ITGB1	CTSG	CEACAM5	LAD1				TEK	AKT1			TPSB2	SPARC	CD36	KRAS	HIPK1	VEGFB	IRF6	RBX1	ITGA5	PLCG2
DICER1	LAMA5	MAPK1	SLC2A1	COL4A6	SRPK2			DENR	KRAS	EMCN	FGF2	KDR	SLC44A4	IL18	PIK3R5	ITGB3	DCN	CEACAM6	LLGL2				TIMP1	RPS6KB1			VEGFA	SPINK5	CD44	MTDH	HIPK2		ISL1	RHOA	ITGB3	PPP3R1
DLL4	LAMC1	MMP1	TP53	COL5A1	TGFB2			DICER1	LAMC1	EMILIN1	FGF9	KRAS	SP1	ITGA1	PLCG1	ITGB4	DPT	CEP170	MYCL				TLR4				VEGFB	STAB1	CD46	NF2	HMOX1		ITGA1	ROCK1	ITGB8	PRKCB
ECM1	LOXL2	NOS2		COL6A1	THBS1			DLG1	MTBP	EPHB3	FGFR1	MAP2K1		ITGA11	PRKCB	ITGB6	ECM1	CGN	OAS1				VEGFA					STAT1	CD82	NPR1	HSPB1		ITGA5	ROCK2	KDR	PTGS2
ECSCR	MMRN2	NOS3		COL6A2	TXNIP			DPT	NF2	ERBB3	FGFR2	MAP2K2		ITGA2	PRKCZ	ITGB7	EGFL7	CHRDL1	PKN1									SULF1	CDC42	NRP1	IL1A		ITGA6	RPS6KB1	LAMA4	PTK2
EGFL7	NID2	PDGFA		COL6A3	UBA52			ECM1	NFATC2	F11R	FGFR3	MAPK1		ITGA9	PTK2	ITGB8	EMILIN1	CLDN3	PLS1									TEK	CDH1	PDCD10	IL1B		ITGA7	RPS6KB2	LOX	RAC1
EIF2AK3	P3H2	PECAM1		COL7A1	VASH1			EDN1	NME1	FBLN5	FGFR4	MAPK3		ITGB1	PTK6	LAMA3	F3	CLEC2B	POPDC3									THBS1	CDH11	PDGFRB	ISL1		ITGAM	SMAD1	MAP2K1	RAC2
ELK3	RUNX1	PIK3CA		COMP				EGFR	NOS3	FMOD	FHL1	MMP9		LOX	RAC1	LAMA4	FBLN1	CLIC4	PPL									THBS2	CDH13	PKN1	KDR		ITGB1	SMAD2	MCAM	RAF1
EMCN	SERPINF1	PIK3CG		CTNND1				EGLN3	NRP1	FRAS1	FMOD	MTOR		LUM	RAF1	LAMA5	FBLN5	COL1A1	PPP3R1									THBS4	CDK14	PLEKHO1	LRG1		ITGB2	SMAD3	MEG3	SPHK2
ENPEP	SMC3	PIK3R2		CX3CL1				EMP3	PDCD10	GJA5	GATA4	NPR1		MMP1	RHOA	LAMB3	FBN1	COL5A2	PRSS8									TIE1	CEACAM1	PNPLA6	MTDH		ITGB3	SMAD4	NDP	SRC
EPAS1	SPARC	PIK3R5		CXADR				EPHA2	PDGFA	HEG1	GREM1	NRP1		MMP2	RRAS	LAMC1	FBN2	COL6A1	S100A14									VASH1	CEACAM5	PPL	NOS3		KDR	SMAD5	NR3C1	VEGFA
EPHA1	TGFBI	PIK3R6		CXCL12				EPHB1	PDGFRB	HGF	HIF1A	PDGFA		MMP3	SRC	LAMC2	FGFR2	COL6A2	SDC4										CEACAM6	PRSS8	PDCL3		KRT19	SMAD9	NRP1	VEGFB
EPHA2	THBS2	PLAU		CXCR3				F3	RAF1	HMOX1	HPSE	PDGFRB		MMP9	STAT1	SDC4	FMOD	CRISPLD2	SLC35A3										CHRNA7	RAF1	PIK3R6		MCAM	SMURF1	NRP2
EPHB1	THBS4	PLAUR		CYP1B1				FASLG	SPARC	HPSE	ID1	PIK3CA		NID2	STAT3	SPP1	FN1	CSF2RB	SLC37A1										CIB1	S100A14	PLCG1		MET	SMURF2	OVOL2
EPHB3	TIMP1	PLCG1		DAG1				FGF2	SPHK2	HSP90B1	IGF1	PIK3R2		PCOLCE	TP53	THBS1	FRAS1	CTSH	SPINT1										CLDN1	SLC35A3	PRKCB		MYC	SP1	PDGFC
EPHB4	TIMP2	PLCG2		DDR2				FGF9	SRF	HSPB1	IGFBP4	PPP2R1A		PDGFA	UBA52	THBS2	HAPLN1	CTSK	ST14										CLDN3	SLC37A1	PTGIS		NCAM1	TFDP1	PIK3CA
EREG	TNC	PRKCB		DLC1				FGFR1	SULF1	HUNK	IL1B	RAF1		SERPINH1	VAV2	THBS4	HSD17B12	CXADR	TACSTD2										CLDN4	SOD1	PTGS2		NOTCH1	TGFB1	PRKCB
FAP	VWA1	RAC1		DLG1				FGFR2	TACSTD2	ID1	IL6	RPS6KB2		SFRP2	VAV3	TNC	HSP90B1	CXCL12	TCF3										CLEC2B	TACSTD2	RAMP2		PECAM1	TGFB2	PTGS2
FGF9	VWA2	RAC2		DPT				FGFR3	TBX1	IL1B	ILK	SMAD4		SMAD4		TNN	HSPG2	CXCR4	TJP3										CLIC4	TIE1	RRAS		PRKCZ	TGFBR2	PTK2
FGFR1		RAF1		DSC2				FGFR4	TEK	ITGA2	INHBE	SMAD5		SRGN		TNXB	IGFBP7	CYP1B1	TMC6										CSF2RB	TJP3	RUNX1		RUNX1	THBS1	QKI
FGFR2		SERPINA1		DST				GPX1	TFDP1	ITGA5	ITGA8	SMURF2		THBS4			IL1RL1	DCN	TMPRSS2										CSPG4	TMC6	SERPINE1		SFRP2	THBS2	RAMP2
FN1		SERPINE1		EMILIN1				HIPK1	TNFSF12	ITGB1	ITGB3	SRC		TNXB			LAMA4	DDR2	TOM1L1										CTNNB1	TMPRSS2	SFRP2		SLC2A1	THBS4	SETD2
GJA5		SERPING1		EPHA1				HIPK2	TNFSF13	ITGB2	JAG1	SULF1					LAMA5	DENND5A	VAMP8										CTNND1	TNFSF13	SRPX2		SNAI1	TNF	SFRP1
GPI		SH2B3		EPHA2				HOXA5	TP53	JAG1	LIFR	VAV2					LAMC1	DESI1	VPS13A										CTSG	VAMP8	TBXA2R		SNAI2	ZFYVE16	SFRP2
GPR56		SOD1		EPHB3				HRAS	VEGFB	JUN	LTBP4	VAV3					LGALS1	DPT											CX3CL1		TEK		SOX17	ZFYVE9	SOX17
GPX1		SRC		EPHB4				ID2	VEGFC	KLK3	LUM	VEGFC					LTBP4	DPYSL3											CXADR		TGFBR2		SOX2		SPHK2
HIF1A		SRGN		ERBB2IP				IGF1	VHL	LAMA4	MEG3						LUM	ECM2											CXCL10		THBS1		SOX9		SPINT1
HMOX1		SYK		ERBB3				IGFBP4		LTBP4	MET						MFAP4	ELF3											CXCR2		TNFRSF1A		SPARC		SRF
HOXB13		TBXA2R		F11R				IL15		MAPK3	NDNF						MGP	EMP3											CXCR3		TNFSF12		SRF		TBX1
HOXB3		TEK		FBLN5				IL18		MED1	NDP						MMP14	ENPP2											CXCR4		TWIST1		STAT3		TDGF1
HSPG2		TFPI2		FERMT2				IL1B		MEG3	NR3C1						MMP2	EPS8L1											CYBB		VEGFA		TDGF1		TGFBR2
ID1		THBS1		FGFR3				IL6		MMP1	NRP2						NDNF	ERMP1											DDR2		VEGFB		TEK		VCAM1
IL18		TIMP1		FN1				ILK		MMP3	OGN						NDP	EVI2A											DLG1		VEGFC		THY1		VEGFA
ITGA5		VAV2		FREM1				IRF6		NF1	PDGFC						NID2	F11R											DST		WNT5A		TWIST1		VEGFB
ITGB3		VAV3		FREM2				ISL1		NID2	PLCG1						OGN	FAM174B											ECSCR				TWIST2		VEGFC
JAG1		VEGFC		GPR56				ITGB3		NOTCH1	PRKCB						OLFML2B	FAP											EMCN				VCAM1
JAM3				GSN				JAG1		NRCAM	PTEN						PCOLCE	FBN1											EMP3				VEGFA
JUN				HAPLN1				JUN		NRXN3	PTGS2						PKM	FERMT2											ENO1				VEGFB
KDR				HAS1				KISS1		P3H2	PTK2B						POSTN	FGFR3											ENO2				VIM
KRIT1				HPSE				KRIT1		PDCD10	RAMP2						PRELP	FGL2											ENPEP
LAMA5				ICAM1				LAMA5		PDCL3	SFRP2						PXDN	FHL1											ENPP2
MAP3K7				IGFBP7				LIFR		PDGFA	SLIT2						SERPINE1	FLI1											EPHA2
MCAM				IL18				MEG3		PDPN	SMAD1						SERPINF1	FN1											EPHB1
MED1				IL1RN				MET		PKN1	SMAD2						SFRP1	FSTL1											EPHB3
MEOX2				ILK				MMP14		PRELP	SMAD3						SFRP2	FUT3											ERBB2IP
MMP14				ISLR				MTOR		PRKCB	SMAD9						SLPI	FXYD6											EREG
MMP2				ITGA1				MYC		PROK2	SMURF1						SOD1	GALNT7											ERMP1
MMRN2				ITGA11				NDP		PTGS2	SOX17						SPARC	GIMAP4											EVI2A
NAA15				ITGA2				NF1		PTK2	SPARC						SPOCK3	GIMAP6											F11R
NCL				ITGA3				NOS2		PTPRB	TDGF1						TGFB2	GPR56											F3
NOS3				ITGA5				NOX5		RAC1	TGFB1						TGFBI	GZMK											FAM174B
NOX5				ITGA6				NR3C1		RAC2	TGFB2						THBS1	HDHD3											FAP
NRCAM				ITGA7				NR4A1		RBPJ	TGFBR2						THBS4	HEG1											FASLG
NRP1				ITGA8				NR4A3		RHOA	THBS4						TNC	HGF											FGFR2
NRP2				ITGA9				NRP2		ROCK1	TNN						TNXB	HIF1A											FGFR3
NRXN1				ITGAM				OGN		RPS27A	TXNIP						VCAN	IGF1											FGFR4
NRXN3				ITGB1				OVOL2		SMAD2	TYMP							IL10RA											FHL1
OVOL2				ITGB2				PDGFC		SNAI1	VEGFA							IRF6											FLT1
PDCD10				ITGB3				PDPN		SNAI2	VEGFB							ISLR											FLT4
PDCL3				ITGB4				PIK3CG		SOX9	ZFYVE9							ITGB4											FRAS1
PDGFA				ITGB6				PLAU		SRPX2								ITGB6											FREM1
PIK3CA				ITGB7				PLAUR		TDGF1								ITM2A											FXYD6
PIK3CG				ITGB8				PMP22		TGFB1								JAM2											GALNT7
PIK3R6				JAM2				PROK2		TGFB2								JAM3											GJA5
PKNOX1				JAM3				PTEN		TLR4								KCNJ8											GPR124
PLXDC1				LAMA3				PTGS2		TMEM30B								KIAA1462											GPR56
PLXND1				LAMA4				PTK2B		TNF								KRT19											HAS1
PNPLA6				LAMA5				PTPRC		TNFSF12								LGALS1											HEG1
PROK2				LAMB3				PTPRM		TNXB								LHFP											HLA-DPB1
PTEN				LAMC1				RAB25		TWIST1								LOX											HRAS
PTGS2				LAMC2				RAC2		VCAN								LOXL2											HSD17B12
PTK2				LOXL2				RORB		VEGFC								LY96											HSPB1
PTK2B				MAP2K1				S1PR1		VHL								MAF											ICAM1
PTPRB				MAP2K2				SCG2		VSIG4								MEOX2											IL10RA
RAMP1				MAPK1				SERPINF1		WIPF1								MFAP4											IL13RA2
RAMP2				MAPK3				SET		WNT5A								MISP											IL15
RBPJ				MCAM				SFRP1		WNT5B								MMP2											IL18
ROBO4				MFAP4				SFRP2										MPDZ											IL1RL1
RORA				MGAT5				SHB										MRC1											IL1RN
RTN4				MMP14				SMAD1										MS4A4A											IL6
S100A7				NCAM1				SOX9										MS4A6A											ILK
S1PR1				NF2				SRC										MUC1											ITGA1
SCG2				NID2				SRPK2										MYLK											ITGA11
SERPINE1				NRCAM				SSTR2										MYO1D											ITGA2
SETD2				NRP1				STAT1										MYO5C											ITGA3
SHB				NRP2				STAT3										NAP1L3											ITGA5
SIRT1				NRXN1				SYK										NOTCH1											ITGA6
SLC12A6				NRXN3				TDGF1										NR3C1											ITGA8
SOX17				PDPN				TGFB1										OCLN											ITGA9
SRF				PECAM1				TGFB2										OLFML2B											ITGAM
SRPK2				PIK3CG				TGFBI										OVOL2											ITGB1
SRPX2				PIK3R1				TGFBR2										P3H1											ITGB2
SYK				PLAU				THBS1										PCOLCE											ITGB3
TAL1				PLXNC1				THBS4										PDGFC											ITGB4
TBX1				POSTN				TIMP1										PLEKHO1											ITGB6
TEK				PTK2				TIMP2										PLXNC1											ITGB7
TGFB2				PTK2B				TNC										PMP22											ITGB8
TGFBI				PTPRC				TWIST2										PPFIBP2											ITM2A
THY1				PTPRM				TXNIP										PRF1											JAG1
TIE1				RAC1				VASH1										PROM1											JAM2
TMEM100				RHOA				VAV3										PRR15L											KCNJ8
TNFRSF12A				ROCK1				VCAM1										PTGDS											KDR
TNFSF12				ROCK2				VCAN										PTGIS											LAMA5
TYMP				S100A7				VEGFA										PTK6											LHFP
VASH1				S1PR1				VSIG4										PTPRC											LIFR
VAV2				SDC4				WNT5A										PTRF											LY96
VAV3				SELE				ZEB1										PTX3											MAP2K1
VEGFA				SNAI2				ZEB2										PYCARD											MAP3K7
VEGFB				SPP1														QKI											MCAM
VEGFC				SRC														RAB25											MET
VEZF1				SRF														RBM47											MGAT5
WARS				SRPX2														RTN4											MMP14
ZC3H12A				STAB1														RUNX1T1											MMP2
				SYK														SACS											MPDZ
				TEK														SAMSN1											MRC1
				TGFBI														SCNN1A											MS4A4A
				THBS1														SERINC5											MS4A6A
				THBS2														SERPINE1											MUC1
				THBS4														SERPINF1											NCAM1
				THY1														SERPING1											NDRG1
				TNC														SFRP1											NFATC2
				TNFRSF12A														SFRP2											NID2
				TNS1														SH2B3											NOS3
				TNXB														SH2D3A											NOTCH1
				VAV3														SH3YL1											NOX5
				VCAM1														SLC44A4											NRCAM
				VCAN														SLIT2											NRP2
																		SLPI											NRXN1
																		SMAD2											NRXN3
																		SNAI1											OCLN
																		SNAI2											PDPN
																		SNAI3											PECAM1
																		SORD											PIK3CD
																		SOX2											PIK3CG
																		SOX9											PIK3R1
																		SPARC											PLAU
																		SPARCL1											PLAUR
																		SPDEF											PLCG1
																		SRGN											PLCG2
																		STAT3											PLXDC1
																		SYNE1											PLXNC1
																		TCF4											PLXND1
																		TGFB2											PMP22
																		TJP2											POPDC3
																		TMEM30B											PRF1
																		TMPRSS4											PRKCB
																		TNC											PRKCZ
																		TNFSF13											PROM1
																		TNS1											PTEN
																		TPM2											PTGIS
																		TSPAN1											PTK6
																		TWIST1											PTPRB
																		TWIST2											PTPRC
																		VAV3											PTPRM
																		VCAM1											PTRF
																		VCAN											QKI
																		VIM											RAB25
																		VSIG4											RAC1
																		WIPF1											RAC2
																		WNT5A											RAMP1
																		WWTR1											RAMP2
																		ZCCHC24											RHOA
																		ZEB1											ROBO4
																		ZEB2											ROCK2
																													RPS27A
																													RRAS
																													RTN4
																													S1PR1
																													SCNN1A
																													SDC4
																													SELE
																													SERINC5
																													SERPINE1
																													SFRP1
																													SFRP2
																													SHB
																													SLC12A6
																													SLC2A1
																													SLC44A4
																													SLIT2
																													SMURF1
																													SMURF2
																													SRC
																													SSTR2
																													ST14
																													STAB1
																													STAT3
																													SULF1
																													SYK
																													SYNE1
																													TBXA2R
																													TDGF1
																													TEK
																													TGFBI
																													TGFBR2
																													THBS1
																													THY1
																													TJP2
																													TLR4
																													TMEM100
																													TMEM30B
																													TMPRSS4
																													TNF
																													TNFRSF12A
																													TNFSF10
																													TNFSF12
																													TSPAN1
																													UBA52
																													VAV2
																													VAV3
																													VCAM1
																													VIM
																													WNT5A
																													WNT5B
																													ZC3H12A
