# Supplementary material for: Bladder Tumor Subtype Commitment Occurs in Carcinoma In Situ Driven by Key Signaling Pathways Including ECM Remodeling
Source: Oxford University Press journal article supplement (doi:10.1158/0008-5472.can-20-2336), 2021-01-20
Supplement: 00085472can202336-sup-247069_2_supp_6822700_qmgxyg.xlsx [file 00085472can202336-sup-247069_2_supp_6822700_qmgxyg.xlsx]

## Sheet: Tabelle1
Supplementary Table 4. Pairwise group P-values of analyses with multiple group comparisons tested by non-parametric Kruskal-Wallis tests.
All displayed P-values were calculated by two-sided non parametric Mann-Whitney tests.
Ad Figure 4F - ECM Score
Variable A	Variable B	Score Mean Difference	Std Err Dif	Z	P-Value	Hodges-Lehmann	Lower CL	Upper CL
MIBC	DYS	-15.9808	3.87259	-4.12663	<0.0001	-1.16892	-1.59188	-0.716
MIBC	CIS	-28.526	4.83571	-5.89902	<0.0001	-1.26381	-1.6101	-0.92699
U/HYP/DYS	MIBC	22.0753	4.12621	5.35002	<0.0001	1.29101	0.88917	1.63231
MIBC	HYP	-15.0769	4.24829	-3.54894	0.0004	-1.37365	-2.0448	-0.63426
pT1	CIS	-18.1708	5.27129	-3.44713	0.0006	-1.48634	-2.01736	-0.82483
U	MIBC	14.9038	4.43947	3.35713	0.0008	1.50922	0.73193	2.26359
pT1	DYS	-7.8974	2.81501	-2.80547	0.005	-1.41491	-2.04201	-0.58105
U/HYP/DYS	pT1	12.2986	3.7792	3.25429	0.0011	1.46878	0.84595	2.05801
pT1	U	-5.6	2.33333	-2.4	0.0164	-1.70058	-2.66804	-0.57854
pT1	HYP	-5.4167	2.35702	-2.2981	0.0216	-1.52259	-2.48056	-0.60389
U	DYS	2.7692	2.80788	0.98624	0.324	0.3028	-0.45875	1.1293
pT1	MIBC	-2.7671	3.96269	-0.69829	0.485	-0.22491	-0.79956	0.52713
U	CIS	4.1625	6.22956	0.66819	0.504	0.21948	-0.44882	0.91546
HYP	DYS	1.5833	2.77613	0.57034	0.5684	0.23824	-0.56773	0.91059
DYS	CIS	-2.7519	4.92998	-0.5582	0.5767	-0.09928	-0.51048	0.29488
HYP	CIS	1.0542	5.87603	0.1794	0.8576	0.05243	-0.45241	0.722
U	HYP	0.1833	2.00832	0.09129	0.9273	0.07169	-1.26725	1.31924
U/HYP/DYS	CIS	-0.1333	4.80718	-0.02774	0.9779	-0.00392	-0.31898	0.32378
n.s.	P<0.05
Ad Figure 4G - EMT Score
Variable A	Variable B	Score Mean Difference	Std Err Dif	Z	P-Value	Hodges-Lehmann	Lower CL	Upper CL
U/HYP/DYS	pT1	13.9792	3.7792	3.69898	0.0002	1.25129	0.73184	1.85742
pT1	MIBC	-13.3868	3.96269	-3.3782	0.0007	-1.3572	-2.05113	-0.67079
pT1	DYS	-8.8376	2.81501	-3.13946	0.0017	-1.11412	-1.83694	-0.45385
pT1	HYP	-6.8056	2.35702	-2.88735	0.0039	-1.4621	-2.19236	-0.61509
pT1	CIS	-15.0403	5.27129	-2.85324	0.0043	-0.88177	-1.47528	-0.28045
pT1	NU	-5.9111	2.33333	-2.53333	0.0113	-1.51173	-2.45548	-0.41486
MIBC	CIS	10.3125	4.83571	2.13257	0.033	0.45512	0.02916	0.90579
U/HYP/DYS	CIS	9.0667	4.80718	1.88607	0.0593	0.36979	-0.00867	0.8192
HYP	CIS	9.1042	5.87603	1.54937	0.1213	0.54529	-0.12546	1.21171
NU	CIS	8.8875	6.22956	1.42667	0.1537	0.50843	-0.21899	1.4071
DYS	CIS	4.8923	4.92998	0.99236	0.321	0.2873	-0.268	0.80306
HYP	DYS	2.5577	2.77613	0.92132	0.3569	0.34047	-0.40595	0.98032
NU	DYS	2.2154	2.80788	0.78899	0.4301	0.28647	-0.55531	1.22391
MIBC	DYS	2.5962	3.87259	0.67039	0.5026	0.20982	-0.34347	0.87043
U/HYP/DYS	MIBC	-1.4824	4.12621	-0.35926	0.7194	-0.09097	-0.54378	0.36845
NU	MIBC	1.0731	4.43947	0.24171	0.809	0.07902	-0.8412	1.04015
MIBC	HYP	0.1026	4.24829	0.02414	0.9807	0.03625	-0.92671	0.7027
NU	HYP	0	2.00832	0	1	0.039	-1.17933	1.02061
n.s.	P<0.05
Ad Figure 5B										Ad Figure 5C										Ad Figure 5D													Ad Figure 5F
ADAM15										CHI3L1										CADM1													CDKN1A
Variable A	Variable B	Score Mean Difference	Std Err Dif	Z	P-Value	Hodges-Lehmann	Lower CL	Upper CL		Variable A	Variable B	Score Mean Difference	Std Err Dif	Z	P-Value	Hodges-Lehmann	Lower CL	Upper CL		Variable A	Variable B	Score Mean Difference	Std Err Dif	Z	P-Value	Hodges-Lehmann	Z	P-Value	Hodges-Lehmann	Lower CL	Upper CL		Variable A	Variable B	Score Mean Difference	Std Err Dif	Z	P-Value	Hodges-Lehmann	Lower CL	Upper CL
U/HYP/DYS	pT1	-10.6771	3.06599	-3.48242	0.0005	-1.12	-1.49	-0.72		pT1	CIS	7.9097	2.44621	3.23346	0.0012	1.705	0.94	2.46		pT1	HYP	6.84444	2.33333	2.93333	0.0034	1.59	3.33888	0.0008	2.4	1.32	3.08		U/HYP/DYS	CIS	9.6563	3.0612	3.1544	0.0016	1.605	0.61	2.24
U	pT1	-6.84444	2.33333	-2.93333	0.0034	-1.21	-1.72	-0.74		pT1	DYS	7.36111	2.31241	3.18331	0.0015	2.39	1.63	2.9		U	pT1	-6.84444	2.33333	-2.93333	0.0034	-1.49	-3.12305	0.0018	-3.18	-4.02	-1.46		pT1	DYS	-7.36111	2.35702	-3.12305	0.0018	-2.53	-3.77	-1.27
U/HYP/DYS	CIS	-8.9063	3.0612	-2.9094	0.0036	-1.15	-1.75	-0.49		U/HYP/DYS	MIBC	-9.8438	3.15447	-3.12058	0.0018	-3.9	-5	-3.05		pT1	DYS	6.66667	2.35492	2.83096	0.0046	1.25	-3.03295	0.0024	-0.82	-1.53	-0.4		U/HYP/DYS	MIBC	9.8438	3.30595	2.97759	0.0029	3.865	2.99	4.72
pT1	HYP	6.53333	2.33333	2.8	0.0051	1.21	0.57	1.74		U	pT1	-6.84444	2.32048	-2.94958	0.0032	-2.23	-2.9	-1.34		U/HYP/DYS	MIBC	-9.2188	3.30595	-2.78854	0.0053	-1.12	2.97759	0.0029	3.68	2.46	4.33		U	pT1	6.84444	2.33077	2.93656	0.0033	2.7	1.53	3.66
U/HYP/DYS	MIBC	-9.2188	3.30595	-2.78854	0.0053	-1.56	-2.1	-0.89		pT1	HYP	6.53333	2.33077	2.80308	0.0051	1.75	0.94	2.53		pT1	CIS	6.72917	2.45374	2.74241	0.0061	0.995	2.93333	0.0034	3.32	2.14	3.93		pT1	HYP	-6.53333	2.33333	-2.8	0.0051	-2.67	-3.94	-1.04
U	CIS	-5.3625	2.22017	-2.41535	0.0157	-1.22	-2.15	-0.49		MIBC	CIS	5.8125	2.19245	2.65115	0.008	3.52	1.98	5.46		MIBC	HYP	4.275	1.83712	2.32702	0.02	1.125	-2.93333	0.0034	-3.62	-4.34	-2.54		DYS	CIS	5.97917	2.25924	2.64654	0.0081	1.52	0.35	2.31
MIBC	HYP	4.275	1.83712	2.32702	0.02	1.63	0.22	2.43		MIBC	DYS	4.79167	1.83207	2.61544	0.0089	3.925	3.14	5.46		U	MIBC	-4.275	1.83712	-2.32702	0.02	-1.135	-2.63716	0.0084	-1.2224	-3.24	-0.52		MIBC	CIS	-5.8125	2.20794	-2.63254	0.0085	-2.375	-4.16	-1.39
U	MIBC	-4.275	1.83712	-2.32702	0.02	-1.705	-2.58	-0.53		pT1	MIBC	-5.9583	2.33705	-2.54951	0.0108	-1.81	-3.27	-0.49		MIBC	DYS	3.95833	1.95434	2.02541	0.0428	0.895	2.56526	0.0103	2.495	1.13	3.63		MIBC	DYS	-4.79167	1.95434	-2.45181	0.0142	-3.705	-4.8348	-2.28
HYP	CIS	-5.0375	2.22017	-2.26897	0.0233	-1.185	-2.17	-0.18		U	MIBC	-4.275	1.80624	-2.3668	0.0179	-3.9	-5.46	-2.54		MIBC	CIS	4.3125	2.20794	1.95318	0.0508	0.735	2.56526	0.0103	2.49	0.61	3.16		pT1	CIS	-5.78472	2.45374	-2.35751	0.0184	-1	-2.22	-0.17
pT1	DYS	4.86111	2.35702	2.06239	0.0392	0.99	-0.21	1.51		MIBC	HYP	4.275	1.83712	2.32702	0.02	3.58	1.94	5.46		U/HYP/DYS	CIS	-5.9063	3.0612	-1.92939	0.0537	-0.415	-2.45181	0.0142	-3.42	-4.5348	-0.77		U	MIBC	4.275	1.82945	2.33677	0.0195	4.11	2.46	4.9548
MIBC	DYS	3.95833	1.95434	2.02541	0.0428	1.37	-0.28	2.18		HYP	DYS	3.3	1.84165	1.79187	0.0732	0.705	-0.04	1.45		U	CIS	-4.0625	2.22017	-1.82981	0.0673	-0.51	2.39097	0.0168	2.085	0.17	3.28		MIBC	HYP	-4.275	1.83712	-2.32702	0.02	-3.835	-5.0548	-1.53
DYS	CIS	-4.22917	2.25924	-1.87194	0.0612	-0.965	-1.84	0.26		DYS	CIS	-3.5	2.04006	-1.71563	0.0862	-0.47	-1.55	0		HYP	CIS	-3.7375	2.22017	-1.68343	0.0923	-0.505	2.32702	0.02	3.645	2.02	4.5348		U	CIS	5.0375	2.21712	2.27209	0.0231	1.67	0.43	2.58
pT1	MIBC	-3.79167	2.34027	-1.62019	0.1052	-0.405	-1.06	0.28		U	HYP	-2.6	1.85592	-1.40092	0.1612	-0.52	-1.45	0.46		pT1	MIBC	2.70833	2.34027	1.15728	0.2472	0.36	-2.32702	0.02	-3.735	-5.0548	-2.42		HYP	CIS	4.7125	2.22017	2.12258	0.0338	1.68	0.01	2.97
HYP	DYS	-1.65	2.00832	-0.82158	0.4113	-0.175	-1.82	0.69		U/HYP/DYS	CIS	-3.9375	2.86518	-1.37426	0.1694	-0.445	-1.16	0		DYS	CIS	-1.89583	2.25924	-0.83915	0.4014	-0.21	1.15728	0.2472	0.24	-0.59	0.8648		pT1	MIBC	4.15278	2.34027	1.77449	0.076	1.325	-0.23	2.3048
U	DYS	-1.65	2.00832	-0.82158	0.4113	-0.265	-1.85	0.47		U	CIS	-2.6	2.11074	-1.2318	0.218	-0.47	-1.55	0.46		HYP	DYS	-1.28333	2.00832	-0.63901	0.5228	-0.35	0.63901	0.5228	0.34	-0.98	2.95		HYP	DYS	0.91667	2.00832	0.45644	0.6481	0.085	-2.1	1.57
MIBC	CIS	1.6875	2.20794	0.76429	0.4447	0.49	-0.93	1.6		U	DYS	1.1	1.57903	0.69663	0.486	0	-0.76	0.85		U	DYS	-1.1	2.00375	-0.54897	0.583	-0.405	-0.41779	0.6761	-0.35	-1.69	1.15		U	DYS	0.18333	2.00375	0.0915	0.9271	0.145	-1.17	1.12
U	HYP	-0.2	1.90904	-0.10476	0.9166	-0.03	-1	0.71		HYP	CIS	0	2.18946	0	1	0	-1.16	0.94		U	HYP	-0.8	1.91485	-0.41779	0.6761	-0.07	0	1	0.085	-1.38	2.6		U	HYP	0	1.90904	0	1	-0.1	-1.31	1.79
pT1	CIS	0.11806	2.45374	0.04811	0.9616	0.035	-0.65	0.53		U/HYP/DYS	pT1	-12.2396	2.99438	-4.08752	<.0001	-2.19	-2.69	-1.63		U/HYP/DYS	pT1	-11.9792	3.0654	-3.90786	<.0001	-1.49	4.04867	<.0001	3.375	2.73	3.84		U/HYP/DYS	pT1	12.2396	3.06599	3.99204	<.0001	2.635	1.8	3.4
n.s.	P<0.05									n.s.	P<0.05									n.s.	P<0.05												n.s.	P<0.05
ADAM17										HMOX1										EGFR													CDKN2A
Variable A	Variable B	Score Mean Difference	Std Err Dif	Z	P-Value	Hodges-Lehmann	Lower CL	Upper CL		Variable A	Variable B	Score Mean Difference	Std Err Dif	Z	P-Value	Hodges-Lehmann	Lower CL	Upper CL		Variable A	Variable B	Score Mean Difference	Std Err Dif	Z	P-Value	Hodges-Lehmann	Z	P-Value	Hodges-Lehmann	Lower CL	Upper CL		Variable A	Variable B	Score Mean Difference	Std Err Dif	Z	P-Value	Hodges-Lehmann	Lower CL	Upper CL
U/HYP/DYS	pT1	-9.20139	3.06481	-3.00227	0.0027	-0.385	-0.6	-0.17		U/HYP/DYS	CIS	-11.3438	3.06186	-3.70485	0.0002	-1.37	-1.84	-0.88		U/HYP/DYS	CIS	10.9688	3.06053	3.58394	0.0003	0.68	-3.62468	0.0003	-0.53	-0.66	-0.34		U/HYP/DYS	pT1	2.25694	1.73159	1.30339	0.1924	0	0	0
U/HYP/DYS	MIBC	-8.90625	3.30595	-2.69401	0.0071	-0.41	-0.66	-0.13		pT1	DYS	7.36111	2.35702	3.12305	0.0018	1.48	1.08	4.44		pT1	CIS	-8.02778	2.45223	-3.27366	0.0011	-1.145	-2.93333	0.0034	-0.54	-0.74	-0.35		U/HYP/DYS	CIS	2.15625	1.76006	1.2251	0.2205	0	0	0
MIBC	HYP	4.275	1.83712	2.32702	0.02	0.405	0.02	0.84		U/HYP/DYS	MIBC	-9.8438	3.30719	-2.97647	0.0029	-2.165	-2.69	-1.56		pT1	DYS	-7.36111	2.35702	-3.12305	0.0018	-2.025	-2.78854	0.0053	-0.53	-0.73	-0.17		U	pT1	1.24444	1.0435	1.19257	0.233	0	0	5.02
U	MIBC	-4.275	1.83712	-2.32702	0.02	-0.415	-0.84	-0.06		pT1	HYP	6.84444	2.33333	2.93333	0.0034	1.87	1.18	2.29		U/HYP/DYS	MIBC	9.8438	3.3047	2.97871	0.0029	2	-2.69561	0.007	-0.41	-0.56	-0.14		pT1	HYP	-1.24444	1.0435	-1.19257	0.233	0	-4.27	0
pT1	DYS	5.41667	2.35492	2.30015	0.0214	0.38	0.08	0.73		U	pT1	-6.84444	2.33333	-2.93333	0.0034	-1.94	-2.37	-1.53		U	pT1	6.84444	2.33333	2.93333	0.0034	1.87	2.65165	0.008	0.53	0.15	0.74		HYP	CIS	1.1375	1.02774	1.1068	0.2684	0	0	4.27
U	pT1	-5.28889	2.33077	-2.26916	0.0233	-0.38	-0.79	-0.03		U	CIS	-6.3375	2.22017	-2.85451	0.0043	-1.615	-2.02	-0.94		pT1	HYP	-6.84444	2.33333	-2.93333	0.0034	-1.9	2.46938	0.0135	0.53	0.17	0.73		U	CIS	1.1375	1.02774	1.1068	0.2684	0	0	5.02
pT1	HYP	4.82222	2.3282	2.07122	0.0383	0.4	0	0.77		DYS	CIS	-6.27083	2.25924	-2.77564	0.0055	-1.085	-3.56	-0.6		DYS	CIS	6.5625	2.25924	2.90474	0.0037	0.755	-2.41535	0.0157	-0.405	-0.6	-0.14		pT1	DYS	-1.11111	1.02062	-1.08866	0.2763	0	-4.03	0
MIBC	DYS	3.54167	1.95434	1.81221	0.07	0.41	-0.23	0.7		HYP	CIS	-6.0125	2.22017	-2.70812	0.0068	-1.465	-2.05	-0.58		HYP	CIS	5.6875	2.22017	2.56174	0.0104	0.595	-2.32702	0.02	-0.53	-0.81	-0.06		DYS	CIS	1.02083	1.01036	1.01036	0.3123	0	0	4.03
U/HYP/DYS	CIS	-5.4375	3.06053	-1.77665	0.0756	-0.2	-0.42	0.03		MIBC	DYS	4.79167	1.95434	2.45181	0.0142	1.9	1.27	5.45		U	CIS	5.6875	2.22017	2.56174	0.0104	0.62	2.23861	0.0252	0.46	0.03	0.79		U/HYP/DYS	MIBC	1.71875	2.05596	0.835984	0.4032	0	0	4.03
DYS	CIS	-3.64583	2.25924	-1.61374	0.1066	-0.195	-0.5	0.12		MIBC	HYP	4.275	1.83712	2.32702	0.02	2.29	0.97	2.84		MIBC	DYS	-4.79167	1.95434	-2.45181	0.0142	-2.145	2.08207	0.0373	0.6	-0.22	0.81		U	MIBC	0.675	1.00623	0.67082	0.5023	0	0	5.02
MIBC	CIS	3.1875	2.20794	1.44365	0.1488	0.2	-0.19	0.52		U	MIBC	-4.275	1.83712	-2.32702	0.02	-2.33	-2.97	-1.56		U	MIBC	4.275	1.83712	2.32702	0.02	1.98	-1.87194	0.0612	-0.36	-0.6	0.04		MIBC	HYP	-0.675	1.00623	-0.67082	0.5023	0	-4.27	0
pT1	CIS	3.42361	2.45223	1.39612	0.1627	0.19	-0.07	0.48		MIBC	CIS	5.0625	2.20794	2.29286	0.0219	0.81	0.13	1.74		MIBC	HYP	-4.275	1.83712	-2.32702	0.02	-1.98	-1.75904	0.0786	-0.44	-0.6	0.03		MIBC	DYS	-0.625	1.02062	-0.61237	0.5403	0	-4.03	0
U	CIS	-2.6	2.21712	-1.17269	0.2409	-0.2	-0.55	0.05		pT1	CIS	4.48611	2.45223	1.8294	0.0673	0.43	-0.06	0.86		MIBC	CIS	-5.0625	2.20794	-2.29286	0.0219	-1.1398	1.49149	0.1358	0.12	-0.03	0.31		HYP	DYS	0.18333	1.35401	0.1354	0.8923	0	-4.03	4.27
HYP	CIS	-2.4375	2.22017	-1.09789	0.2723	-0.18	-0.55	0.09		pT1	MIBC	-4.15278	2.34027	-1.77449	0.076	-0.445	-0.86	0.13		HYP	DYS	-1.65	2.00832	-0.82158	0.4113	-0.155	0.93413	0.3502	0.155	-0.21	0.62		U	DYS	0.18333	1.35401	0.1354	0.8923	0	-4.03	5.02
pT1	MIBC	-0.72222	2.33383	-0.30946	0.757	-0.07	-0.35	0.43		U	DYS	-3.11667	2.00832	-1.55188	0.1207	-0.5	-0.94	2.98		U	DYS	-1.28333	2.00832	-0.63901	0.5228	-0.11	-0.27386	0.7842	-0.025	-0.47	0.29		MIBC	CIS	0	0	0	1	0	0	0
U	HYP	-0.2	1.90904	-0.10476	0.9166	-0.03	-0.46	0.43		HYP	DYS	-1.65	2.00832	-0.82158	0.4113	-0.395	-0.88	3.05		pT1	MIBC	0	2.34027	0	1	0.04	-0.15452	0.8772	-0.025	-0.24	0.31		pT1	CIS	0	0	0	1	0	0	0
HYP	DYS	-0.18333	2.00832	-0.09129	0.9273	-0.02	-0.54	0.34		U	HYP	-0.8	1.91485	-0.41779	0.6761	-0.09	-0.96	0.49		U	HYP	0	1.90321	0	1	0	0.10476	0.9166	0.02	-0.58	0.25		pT1	MIBC	0	0	0	1	0	0	0
U	DYS	-0.18333	2.00832	-0.09129	0.9273	-0.04	-0.6	0.3		U/HYP/DYS	pT1	-12.4132	3.06658	-4.04789	<.0001	-1.805	-2.12	-1.42		U/HYP/DYS	pT1	12.4132	3.0654	4.04945	<.0001	1.9	0	1	0.01	-0.54	0.57		U	HYP	0	1.34164	0	1	0	-4.27	5.02
n.s.	P<0.05									n.s.	P<0.05									n.s.	P<0.05												n.s.	P<0.05
COL4A1										PDGFRB										ERBB2													PTEN
Variable A	Variable B	Score Mean Difference	Std Err Dif	Z	P-Value	Hodges-Lehmann	Lower CL	Upper CL		Variable A	Variable B	Score Mean Difference	Std Err Dif	Z	P-Value	Hodges-Lehmann	Lower CL	Upper CL		Variable A	Variable B	Score Mean Difference	Std Err Dif	Z	P-Value	Hodges-Lehmann	Z	P-Value	Hodges-Lehmann	Lower CL	Upper CL		Variable A	Variable B	Score Mean Difference	Std Err Dif	Z	P-Value	Hodges-Lehmann	Lower CL	Upper CL
U/HYP/DYS	pT1	-12.066	3.06658	-3.93466	<.0001	-1.715	-2.49	-1.09		U/HYP/DYS	pT1	-9.28819	3.0654	-3.03001	0.0024	-0.81	-1.51	-0.4		pT1	DYS	7.36111	2.35702	3.12305	0.0018	1.515	3.12305	0.0018	1.515	0.97	4.08		pT1	DYS	-7.36111	2.35492	-3.12585	0.0018	-0.825	-1.22	-0.41
U/HYP/DYS	MIBC	-9.8438	3.30719	-2.97647	0.0029	-2.145	-3.1	-1.13		pT1	DYS	6.25	2.35492	2.65402	0.008	1.23	0.21	3		U/HYP/DYS	MIBC	-9.8438	3.30595	-2.97759	0.0029	-1.055	-2.97759	0.0029	-1.63	-2.47	-0.87		U	pT1	6.84444	2.33077	2.93656	0.0033	1.03	0.79	1.25
pT1	HYP	6.84444	2.33333	2.93333	0.0034	1.56	0.56	2.58		U/HYP/DYS	MIBC	-7.96875	3.30595	-2.41043	0.0159	-0.4552	-1.32	-0.09		pT1	HYP	6.84444	2.33333	2.93333	0.0034	1.06	-2.93656	0.0033	-1.58	-2.01	-0.86		pT1	HYP	-6.84444	2.33077	-2.93656	0.0033	-1.01	-1.25	-0.8
U	pT1	-6.84444	2.33333	-2.93333	0.0034	-1.77	-2.92	-1.1		U	MIBC	-4.275	1.83712	-2.32702	0.02	-0.4176	-1.32	-0.0752		U	pT1	-6.84444	2.33333	-2.93333	0.0034	-1.31	2.8	0.0051	1.24	0.61	1.82		pT1	CIS	-7.20139	2.45223	-2.93666	0.0033	-0.485	-0.85	-0.22
pT1	DYS	6.80556	2.35702	2.88735	0.0039	1.895	0.75	3.12		U	pT1	-5.28889	2.33077	-2.26916	0.0233	-0.78	-1.58	-0.35		pT1	CIS	6.72917	2.45374	2.74241	0.0061	0.885	2.45181	0.0142	1.85	0.57	5		U/HYP/DYS	MIBC	9.5313	3.30719	2.88198	0.004	1.1774	0.54	1.45
MIBC	DYS	4.79167	1.95434	2.45181	0.0142	2.145	0.5	3.82		MIBC	DYS	3.95833	1.95434	2.02541	0.0428	0.635	-0.0948	2.99		U/HYP/DYS	CIS	-8.1563	3.0612	-2.6644	0.0077	-0.395	-2.33677	0.0195	-1.7	-2.92	-0.33		U/HYP/DYS	CIS	8.0625	3.0612	2.63377	0.0084	0.465	0.16	0.74
U/HYP/DYS	CIS	-7.3125	3.0612	-2.38877	0.0169	-1.07	-1.78	-0.15		pT1	CIS	4.84028	2.45223	1.97382	0.0484	0.88	-0.1	1.74		DYS	CIS	-5.6875	2.25924	-2.51744	0.0118	-0.665	2.32702	0.02	1.37	0.19	2.61		U	MIBC	4.275	1.83712	2.32702	0.02	1.2374	0.42	1.59
MIBC	HYP	4.275	1.83712	2.32702	0.02	1.94	0.92	3.69		pT1	HYP	4.04444	2.33077	1.73524	0.0827	0.66	-0.33	1.57		MIBC	DYS	4.79167	1.95434	2.45181	0.0142	1.215	-2.11314	0.0346	-0.57	-1.24	-0.03		MIBC	HYP	-4.275	1.83712	-2.32702	0.02	-1.2374	-1.47	-0.43
U	MIBC	-4.275	1.83712	-2.32702	0.02	-2.335	-3.68	-1.18		MIBC	CIS	3.5625	2.20794	1.61349	0.1066	0.47	-0.35	2.92		MIBC	HYP	4.275	1.83712	2.32702	0.02	0.75	1.97261	0.0485	0.87	-0.01	1.6		U	CIS	5.0375	2.22017	2.26897	0.0233	0.535	0.08	0.87
U	CIS	-4.7125	2.22017	-2.12258	0.0338	-1.22	-2.21	-0.03		pT1	MIBC	3.43056	2.33705	1.4679	0.1421	0.2524	-0.8052	1.27		U	MIBC	-4.275	1.83712	-2.32702	0.02	-1.055	1.95318	0.0508	1.05	-0.37	2.25		MIBC	DYS	-4.375	1.95434	-2.23861	0.0252	-0.91	-1.6948	-0.04
MIBC	CIS	4.3125	2.20794	1.95318	0.0508	1.06	-0.42	2.99		MIBC	HYP	2.475	1.83712	1.34722	0.1779	0.405	-0.6548	1.32		U	CIS	-5.0375	2.22017	-2.26897	0.0233	-0.405	-1.87194	0.0612	-0.705	-3.14	0.23		HYP	CIS	4.7125	2.22017	2.12258	0.0338	0.535	0.09	0.86
pT1	CIS	4.13194	2.45374	1.68394	0.0922	0.85	-0.1	1.79		HYP	CIS	1.1375	2.22017	0.51235	0.6084	0.105	-0.66	1.33		HYP	DYS	3.66667	2.00375	1.82991	0.0673	0.435	-1.83233	0.0669	-0.61	-1.51	0.16		MIBC	CIS	-4.3125	2.20794	-1.95318	0.0508	-0.6674	-1.31	0.1
DYS	CIS	-3.64583	2.25924	-1.61374	0.1066	-1.175	-2.41	0.06		HYP	DYS	0.91667	2.00832	0.45644	0.6481	0.23	-0.45	2.55		MIBC	CIS	3.5625	2.20794	1.61349	0.1066	0.54	1.18673	0.2353	0.37	-0.47	3.59		DYS	CIS	3.5	2.25676	1.5509	0.1209	0.325	-0.21	0.8
HYP	CIS	-3.575	2.21712	-1.61245	0.1069	-0.66	-1.84	0.62		U	HYP	-0.6	1.90904	-0.31429	0.7533	-0.09	-1	0.35		pT1	MIBC	3.43056	2.34027	1.46588	0.1427	0.265	-1.04765	0.2948	-0.29	-0.99	0.69		HYP	DYS	2.01667	2.00832	1.00416	0.3153	0.13	-0.3	0.61
U	HYP	-2.4	1.91485	-1.25336	0.2101	-0.55	-1.31	0.67		DYS	CIS	-0.58333	2.25676	-0.25848	0.796	-0.165	-2.07	0.56		HYP	CIS	-2.4375	2.22017	-1.09789	0.2723	-0.215	-0.9515	0.3413	-0.32	-1.2	0.45		U	DYS	2.01667	2.00832	1.00416	0.3153	0.16	-0.34	0.65
pT1	MIBC	-2.3472	2.34027	-1.00297	0.3159	-0.375	-1.52	1.12		U	CIS	-0.4875	2.22017	-0.21958	0.8262	-0.04	-0.62	0.6		U	DYS	2.01667	2.00832	1.00416	0.3153	0.195	0.27449	0.7837	0.175	-0.71	3.3		pT1	MIBC	1.9861	2.33705	0.84984	0.3954	0.2074	-0.55	0.5448
HYP	DYS	0.55	2.00832	0.27386	0.7842	0.56	-0.96	1.83		U	DYS	0	2.00832	0	1	-0.01	-0.49	2.61		U	HYP	-1.6	1.91485	-0.83557	0.4034	-0.27	-0.23146	0.817	-0.15	-0.97	0.7		U	HYP	0	1.91485	0	1	-0.01	-0.22	0.31
U	DYS	0	2.00832	0	1	-0.01	-1.3	1.2		U/HYP/DYS	CIS	0	3.06053	0	1	-0.01	-0.59	0.47		U/HYP/DYS	pT1	-12.4132	3.06599	-4.04867	<.0001	-1.31	-3.99204	<.0001	-1.475	-1.92	-0.98		U/HYP/DYS	pT1	12.4132	3.06599	4.04867	<.0001	0.97	0.77	1.15
n.s.	P<0.05									n.s.	P<0.05									n.s.	P<0.05												n.s.	P<0.05
COL4A2										SMAD3										ERBB3													TP53
Variable A	Variable B	Score Mean Difference	Std Err Dif	Z	P-Value	Hodges-Lehmann	Lower CL	Upper CL		Variable A	Variable B	Score Mean Difference	Std Err Dif	Z	P-Value	Hodges-Lehmann	Lower CL	Upper CL		Variable A	Variable B	Score Mean Difference	Std Err Dif	Z	P-Value	Hodges-Lehmann	Z	P-Value	Hodges-Lehmann	Lower CL	Upper CL		Variable A	Variable B	Score Mean Difference	Std Err Dif	Z	P-Value	Hodges-Lehmann	Lower CL	Upper CL
U/HYP/DYS	pT1	-10.5903	3.0654	-3.45477	0.0006	-1.375	-2.13	-0.7		pT1	CIS	-8.38194	2.45374	-3.41599	0.0006	-2.17	-3.07	-1.55		U/HYP/DYS	pT1	-9.72222	3.06599	-3.17099	0.0015	-0.585	3.12585	0.0018	0.315	0.09	0.48		pT1	DYS	7.36111	2.35492	3.12585	0.0018	0.965	0.6	1.5
U/HYP/DYS	MIBC	-9.2188	3.30595	-2.78854	0.0053	-1.91	-3	-0.84		pT1	DYS	-7.36111	2.35702	-3.12305	0.0018	-3.23	-3.88	-2.61		pT1	DYS	6.80556	2.35702	2.88735	0.0039	0.76	2.93656	0.0033	0.57	0.35	0.74		pT1	HYP	6.84444	2.33077	2.93656	0.0033	0.43	0.15	0.93
U	pT1	-6.22222	2.33333	-2.66667	0.0077	-1.51	-2.55	-0.7		U/HYP/DYS	MIBC	9.8438	3.30719	2.97647	0.0029	3.6474	3.3048	4.01		U	pT1	-5.13333	2.33077	-2.20242	0.0276	-0.45	-2.93656	0.0033	-0.52	-0.81	-0.22		U	pT1	-6.84444	2.33077	-2.93656	0.0033	-0.69	-0.96	-0.39
pT1	HYP	6.06667	2.33077	2.60286	0.0092	1.33	0.28	2.51		U	pT1	6.84444	2.33333	2.93333	0.0034	3.23	2.77	3.9		pT1	CIS	5.07639	2.45374	2.06884	0.0386	0.64	2.6527	0.008	0.265	0.09	0.43		pT1	CIS	6.84722	2.45073	2.79395	0.0052	0.53	0.26	0.91
pT1	DYS	5.69444	2.35702	2.41595	0.0157	1.325	0.25	2.83		pT1	HYP	-6.84444	2.33333	-2.93333	0.0034	-3.06	-3.79	-2.57		pT1	HYP	4.35556	2.33333	1.86667	0.0619	0.53	-2.55222	0.0107	-0.52	-0.86	-0.12		U/HYP/DYS	MIBC	-9.2188	3.30719	-2.78749	0.0053	-0.555	-1.09	-0.16
MIBC	HYP	4.275	1.83712	2.32702	0.02	1.795	0.59	3.61		MIBC	CIS	-5.8125	2.20794	-2.63254	0.0085	-2.575	-4.16	-1.9		U/HYP/DYS	MIBC	-4.84375	3.30719	-1.46461	0.143	-0.36	-2.41535	0.0157	-0.285	-0.55	-0.05		MIBC	DYS	4.79167	1.95434	2.45181	0.0142	0.795	0.2	1.5
U	MIBC	-4.275	1.83712	-2.32702	0.02	-1.965	-3.46	-0.57		U/HYP/DYS	CIS	7.9688	3.06186	2.60258	0.0093	1.075	0.41	1.48		MIBC	DYS	2.70833	1.95434	1.3858	0.1658	0.57	2.32702	0.02	0.63	0.02	1.17		U	MIBC	-4.275	1.83712	-2.32702	0.02	-0.52	-0.99	-0.06
MIBC	DYS	3.95833	1.95434	2.02541	0.0428	1.72	-0.39	4.07		MIBC	DYS	-4.79167	1.95434	-2.45181	0.0142	-3.6474	-4.3648	-3.07		MIBC	HYP	2.475	1.83712	1.34722	0.1779	0.315	-2.0996	0.0358	-0.265	-0.54	0.03		MIBC	HYP	3.375	1.83712	1.83712	0.0662	0.325	-0.02	1.14
U/HYP/DYS	CIS	-6.0938	3.0612	-1.99064	0.0465	-0.87	-1.87	0.1		U	MIBC	4.275	1.83712	2.32702	0.02	3.7024	3.22	4.34		U	DYS	2.38333	2.00832	1.18673	0.2353	0.22	-1.96781	0.0491	-0.6	-1.19	0.15		pT1	MIBC	3.79167	2.33705	1.62242	0.1047	0.15	-0.19	0.44
U	CIS	-3.7375	2.22017	-1.68343	0.0923	-0.975	-2.33	0.14		MIBC	HYP	-4.275	1.83712	-2.32702	0.02	-3.5374	-4.11	-3.19		MIBC	CIS	2.4375	2.20794	1.10397	0.2696	0.46	-1.89877	0.0576	-0.175	-0.37	0.01		DYS	CIS	-3.64583	2.25924	-1.61374	0.1066	-0.48	-1.12	0.11
MIBC	CIS	3.1875	2.20794	1.44365	0.1488	1.04	-0.66	2.73		DYS	CIS	4.8125	2.25924	2.13014	0.0332	1.085	0.07	1.71		HYP	DYS	2.01667	2.00832	1.00416	0.3153	0.4	1.81221	0.07	0.465	-0.16	0.76		MIBC	CIS	3.5625	2.20794	1.61349	0.1066	0.305	-0.31	0.93
HYP	CIS	-3.0875	2.22017	-1.39066	0.1643	-0.835	-1.96	0.43		U	CIS	4.3875	2.22017	1.9762	0.0481	1.205	-0.13	1.7		pT1	MIBC	1.98611	2.34027	0.84867	0.3961	0.195	1.78334	0.0745	0.37	-0.14	0.73		HYP	DYS	3.11667	2.00832	1.55188	0.1207	0.475	-0.18	1.16
DYS	CIS	-3.0625	2.25924	-1.35554	0.1752	-0.84	-2.35	0.56		HYP	CIS	3.7375	2.22017	1.68343	0.0923	1.04	-0.16	1.48		HYP	CIS	1.7875	2.22017	0.80512	0.4208	0.14	-1.53704	0.1243	-0.255	-0.56	0.08		U	DYS	2.75	2.00832	1.36931	0.1709	0.295	-0.27	1.02
pT1	CIS	2.9514	2.45374	1.20281	0.229	0.52	-0.46	1.62		pT1	MIBC	3.43056	2.34027	1.46588	0.1427	0.465	-0.33	1.09		DYS	CIS	-1.60417	2.25924	-0.71005	0.4777	-0.2	-1.36931	0.1709	-0.19	-0.51	0.2		U/HYP/DYS	CIS	-3.375	3.0612	-1.10251	0.2702	-0.205	-0.57	0.18
pT1	MIBC	-2.70833	2.34027	-1.15728	0.2472	-0.48	-1.67	0.89		U	HYP	2	1.91485	1.04447	0.2963	0.22	-0.24	0.63		U	MIBC	-1.125	1.83712	-0.61237	0.5403	-0.285	-0.69532	0.4869	-0.145	-0.45	0.34		U	HYP	-2	1.91485	-1.04447	0.2963	-0.18	-0.64	0.47
HYP	DYS	0.73333	2.00375	0.36598	0.7144	0.095	-1.63	2.16		U	DYS	0.55	2.00832	0.27386	0.7842	0.055	-0.66	0.61		U	CIS	0.4875	2.22017	0.21958	0.8262	0.215	-0.38772	0.6982	-0.055	-0.24	0.12		U	CIS	-1.3	2.21712	-0.58635	0.5576	-0.15	-0.57	0.37
U	DYS	-0.55	2.00832	-0.27386	0.7842	-0.2	-2	1.79		HYP	DYS	-0.55	2.00832	-0.27386	0.7842	-0.16	-0.88	0.5		U/HYP/DYS	CIS	0.28125	3.06186	0.09186	0.9268	0.035	0.20889	0.8345	0.06	-0.37	0.5		HYP	CIS	-0.1625	2.22017	-0.07319	0.9417	-0.035	-0.59	0.57
U	HYP	-0.4	1.91485	-0.20889	0.8345	-0.24	-1.4	1.07		U/HYP/DYS	pT1	12.4132	3.06658	4.04789	<.0001	3.165	2.8	3.63		U	HYP	0	1.91485	0	1	0.2	-4.04867	<.0001	-0.41	-0.62	-0.27		U/HYP/DYS	pT1	-12.4132	3.06599	-4.04867	<.0001	-0.715	-1	-0.46
n.s.	P<0.05									n.s.	P<0.05									n.s.	P<0.05												n.s.	P<0.05
MMP2										SPP1										FGFR3
Variable A	Variable B	Score Mean Difference	Std Err Dif	Z	P-Value	Hodges-Lehmann	Lower CL	Upper CL		Variable A	Variable B	Score Mean Difference	Std Err Dif	Z	P-Value	Hodges-Lehmann	Lower CL	Upper CL		Variable A	Variable B	Score Mean Difference	Std Err Dif	Z	P-Value	Hodges-Lehmann	Z	P-Value	Hodges-Lehmann	Lower CL	Upper CL
U/HYP/DYS	pT1	10.2431	3.06599	3.34086	0.0008	2.08	1.12	2.71		U/HYP/DYS	pT1	-9.11458	3.06599	-2.9728	0.003	-1.84	-2.69	-0.89		pT1	CIS	-8.14583	2.45374	-3.31976	0.0009	-1.34	3.12865	0.0018	1.345	0.84	1.92
U	pT1	6.84444	2.33333	2.93333	0.0034	2.1	1.54	3.11		U	pT1	-6.84444	2.33333	-2.93333	0.0034	-2.06	-3.07	-0.91		pT1	DYS	-7.36111	2.35702	-3.12305	0.0018	-2.31	-2.97983	0.0029	-1.695	-2.22	-1.25
pT1	HYP	-6.68889	2.33077	-2.86982	0.0041	-2.27	-2.86	-1.01		U/HYP/DYS	MIBC	-9.21875	3.30595	-2.78854	0.0053	-3.615	-5.46	-1.69		U/HYP/DYS	MIBC	9.8438	3.30719	2.97647	0.0029	3.54	-2.94305	0.0032	-1.38	-1.8	-0.96
U/HYP/DYS	CIS	8.0625	3.0612	2.63377	0.0084	1.92	0.46	2.71		MIBC	DYS	4.79167	1.94841	2.45927	0.0139	3.875	1.62	7.38		U	pT1	6.84444	2.33333	2.93333	0.0034	3.3	2.93656	0.0033	1.71	1.29	1.93
U/HYP/DYS	MIBC	8.2813	3.30719	2.50401	0.0123	2.3024	0.91	3.8348		pT1	MIBC	-5.59722	2.34027	-2.3917	0.0168	-1.755	-3.5	-0.11		pT1	HYP	-6.84444	2.33333	-2.93333	0.0034	-3.56	2.45927	0.0139	1.595	0.87	2.53
U	MIBC	4.275	1.83712	2.32702	0.02	2.945	1.12	4.3048		U	MIBC	-4.275	1.83712	-2.32702	0.02	-3.775	-5.94	-1.47		U/HYP/DYS	CIS	8.5313	3.06186	2.78629	0.0053	1.39	-2.34665	0.0189	-1.6	-2.25	-1.2
MIBC	HYP	-4.275	1.83712	-2.32702	0.02	-2.405	-4.1848	-0.21		pT1	DYS	5.41667	2.35492	2.30015	0.0214	2.085	1.35	3.93		MIBC	CIS	-5.4375	2.20794	-2.4627	0.0138	-2.0874	2.32702	0.02	1.91	1.45	2.64
HYP	CIS	5.0375	2.22017	2.26897	0.0233	1.98	0.29	3.43		U	CIS	-5.0375	2.22017	-2.26897	0.0233	-1.54	-3.21	-0.37		MIBC	DYS	-4.79167	1.95434	-2.45181	0.0142	-2.995	2.29286	0.0219	0.915	0.23	2.21
U	CIS	5.0375	2.22017	2.26897	0.0233	2.04	0.95	3.55		DYS	CIS	-4.8125	2.25676	-2.13249	0.033	-1.77	-3.65	-0.02		U	CIS	5.3625	2.22017	2.41535	0.0157	1.71	2.26546	0.0235	0.585	0.11	1.55
pT1	DYS	-4.02778	2.35702	-1.70884	0.0875	-1.7	-2.96	1.39		U/HYP/DYS	CIS	-6.28125	3.0612	-2.05189	0.0402	-1.345	-2.71	-0.01		U	MIBC	4.275	1.83712	2.32702	0.02	3.73	-2.20646	0.0274	-0.865	-1.31	-0.03
DYS	CIS	3.20833	2.25676	1.42166	0.1551	1.31	-1.88	3.27		MIBC	CIS	4.3125	2.20794	1.95318	0.0508	2.2	-0.57	4.31		MIBC	HYP	-4.275	1.83712	-2.32702	0.02	-4.105	-2.05221	0.0401	-1.135	-1.61	0
MIBC	DYS	-2.70833	1.95434	-1.3858	0.1658	-2.0824	-4.2548	2.81		MIBC	HYP	3.375	1.83712	1.83712	0.0662	2.235	-1.14	5.33		HYP	CIS	4.3875	2.22017	1.9762	0.0481	2.11	-1.54128	0.1232	-0.91	-1.32	0.31
MIBC	CIS	-1.6875	2.20794	-0.76429	0.4447	-0.6374	-2.49	1.64		HYP	DYS	3.48333	2.00375	1.73841	0.0821	1.725	-0.43	3.88		DYS	CIS	4.22917	2.25924	1.87194	0.0612	1.03	-1.35704	0.1748	-0.63	-1.49	0.39
pT1	MIBC	1.625	2.34027	0.69437	0.4875	0.49	-0.91	1.94		U	HYP	-3.2	1.91485	-1.67115	0.0947	-1.06	-4.06	0.88		HYP	DYS	3.11667	2.00832	1.55188	0.1207	1.34	1.26102	0.2073	0.25	-0.1	0.76
HYP	DYS	0.91667	2.00832	0.45644	0.6481	0.25	-1.32	5.19		pT1	CIS	4.01389	2.45223	1.63683	0.1017	0.475	-0.79	1.75		U	DYS	2.01667	2.00832	1.00416	0.3153	1.005	-1.18944	0.2343	-0.345	-0.83	0.31
U	DYS	0.91667	2.00832	0.45644	0.6481	0.825	-1.06	4.74		pT1	HYP	3.11111	2.33333	1.33333	0.1824	0.42	-1.67	1.95		pT1	MIBC	2.34722	2.34027	1.00297	0.3159	0.6174	-1.0831	0.2788	-0.285	-0.92	0.23
pT1	CIS	-0.94444	2.45223	-0.38514	0.7001	-0.205	-1.14	0.74		U	DYS	0.55	2.00375	0.27449	0.7837	0.475	-2.12	2.55		U	HYP	0	1.91485	0	1	-0.26	-0.45958	0.6458	-0.19	-0.73	0.65
U	HYP	0	1.91485	0	1	0.01	-0.87	1.54		HYP	CIS	-0.1625	2.22017	-0.07319	0.9417	-0.025	-2.61	2.05		U/HYP/DYS	pT1	12.4132	3.06658	4.04789	<.0001	2.82	-4.05101	<.0001	-1.43	-1.76	-1.22
n.s.	P<0.05									n.s.	P<0.05									n.s.	P<0.05
MMP9																				STAT3
Variable A	Variable B	Score Mean Difference	Std Err Dif	Z	P-Value	Hodges-Lehmann	Lower CL	Upper CL												Variable A	Variable B	Score Mean Difference	Std Err Dif	Z	P-Value	Hodges-Lehmann	Z	P-Value	Hodges-Lehmann	Lower CL	Upper CL
pT1	MIBC	-4.875	2.33705	-2.08596	0.037	-0.86	-4.28	0.14												pT1	CIS	-8.1458	2.45374	-3.31976	0.0009	-0.9	3.12305	0.0018	0.925	0.48	1.31
U/HYP/DYS/CIS/pT1	MIBC	-11.6326	5.73013	-2.03007	0.0423	-0.82	-3.3	-0.02												pT1	DYS	-7.36111	2.35702	-3.12305	0.0018	-1.15	-2.97647	0.0029	-1.12	-1.61	-0.62
U/HYP/DYS	MIBC	-6.09375	3.30719	-1.84258	0.0654	-0.835	-3.76	0.2												U/HYP/DYS	MIBC	9.8438	3.30097	2.98208	0.0029	1.57	2.93333	0.0034	1.02	0.55	1.41
MIBC	HYP	3.375	1.83712	1.83712	0.0662	0.995	-1.08	4.6												U	pT1	6.84444	2.33333	2.93333	0.0034	1.27	-2.93333	0.0034	-0.98	-1.4	-0.74
MIBC	DYS	2.70833	1.95434	1.3858	0.1658	0.85	-1.08	4.05												pT1	HYP	-6.84444	2.33333	-2.93333	0.0034	-1.18	2.45374	0.0141	0.375	0.07	0.99
pT1	CIS	-3.1875	2.45223	-1.29983	0.1937	-0.435	-1.64	0.3												MIBC	CIS	-5.8125	2.20794	-2.63254	0.0085	-1.28	2.45181	0.0142	1.02	0.31	1.68
MIBC	CIS	2.8125	2.20794	1.27381	0.2027	0.575	-1.61	3.93												MIBC	DYS	-4.79167	1.95434	-2.45181	0.0142	-1.54	-2.45002	0.0143	-0.575	-0.86	-0.14
U	MIBC	-2.025	1.83712	-1.10227	0.2703	-0.735	-4.49	1.01												U	MIBC	4.275	1.83712	2.32702	0.02	1.625	2.32702	0.02	1.12	0.35	1.81
pT1	DYS	-2.36111	2.35492	-1.00263	0.316	-0.31	-1.47	0.98												MIBC	HYP	-4.275	1.83712	-2.32702	0.02	-1.565	-2.32702	0.02	-1.165	-1.74	-0.48
U/HYP/DYS	pT1	3.03819	3.06599	0.99093	0.3217	0.26	-0.36	0.78												pT1	MIBC	4.51389	2.34027	1.92879	0.0538	0.39	-1.87194	0.0612	-0.55	-0.95	0.11
U	pT1	1.86667	2.33077	0.80088	0.4232	0.22	-0.42	1.11												U/HYP/DYS	CIS	5.7188	3.05853	1.86977	0.0615	0.34	1.87153	0.0613	0.605	-0.1	1.5
HYP	CIS	-1.625	2.21712	-0.73293	0.4636	-0.3	-1.99	0.81												U	CIS	3.4125	2.22017	1.53704	0.1243	0.385	-1.82981	0.0673	-0.635	-1.09	0.2
HYP	DYS	-1.28333	2.00832	-0.63901	0.5228	-0.095	-1.68	1.42												HYP	CIS	3.0875	2.22017	1.39066	0.1643	0.315	-1.75904	0.0786	-0.6	-0.95	0.16
U/HYP/DYS	CIS	-1.875	3.0612	-0.61251	0.5402	-0.25	-1.34	0.49												DYS	CIS	2.77083	2.25924	1.22644	0.22	0.27	-0.63901	0.5228	-0.08	-0.55	0.42
DYS	CIS	-1.02083	2.25924	-0.45185	0.6514	-0.205	-1.9	1.04												U	DYS	1.46667	2.00375	0.73196	0.4642	0.075	-0.45644	0.6481	-0.095	-0.5	0.32
pT1	HYP	-0.62222	2.33077	-0.26696	0.7895	-0.18	-1.11	0.74												U	HYP	1.2	1.90321	0.63051	0.5284	0.07	-0.38576	0.6997	-0.1	-0.68	0.45
U	HYP	0.4	1.91485	0.20889	0.8345	0.19	-1.51	1.4												HYP	DYS	0.36667	2.00375	0.18299	0.8548	0.015	0	1	0.04	-0.46	0.37
U	CIS	-0.1625	2.22017	-0.07319	0.9417	-0.26	-1.73	1.07												U/HYP/DYS	pT1	12.4132	3.06363	4.05179	<.0001	1.205	-4.04789	<.0001	-0.97	-1.22	-0.75
U	DYS	0	2.00832	0	1	0.045	-1.6	1.76
																				n.s.	P<0.05
n.s.	P<0.05
MMP14
Variable A	Variable B	Score Mean Difference	Std Err Dif	Z	P-Value	Hodges-Lehmann	Lower CL	Upper CL
U/HYP/DYS	pT1	11.3715	3.06481	3.71035	0.0002	0.64	0.45	0.94
U/HYP/DYS	CIS	9.2813	3.06053	3.03256	0.0024	0.5	0.17	0.76
U	pT1	6.84444	2.33077	2.93656	0.0033	0.65	0.4	1.02
pT1	HYP	-6.84444	2.33077	-2.93656	0.0033	-0.85	-1.08	-0.5
HYP	CIS	6.3375	2.22017	2.85451	0.0043	0.615	0.25	0.93
pT1	DYS	-5.69444	2.35492	-2.41811	0.0156	-0.52	-0.82	-0.11
U	CIS	5.3625	2.22017	2.41535	0.0157	0.505	0.11	0.86
MIBC	HYP	-4.275	1.83712	-2.32702	0.02	-0.6624	-0.89	-0.17
U/HYP/DYS	MIBC	7.3438	3.3047	2.22221	0.0263	0.48	0.13	0.79
HYP	DYS	4.21667	2.00832	2.0996	0.0358	0.33	-0.01	0.92
U	MIBC	3.825	1.83712	2.08207	0.0373	0.51	-0.15	0.84
DYS	CIS	3.64583	2.25924	1.61374	0.1066	0.275	-0.18	0.61
U	HYP	-2.8	1.90321	-1.4712	0.1412	-0.09	-0.45	0.07
pT1	CIS	-3.42361	2.45223	-1.39612	0.1627	-0.17	-0.48	0.1
pT1	MIBC	-3.06944	2.33705	-1.31338	0.1891	-0.2026	-0.7	0.22
U	DYS	2.38333	2.00832	1.18673	0.2353	0.225	-0.13	0.83
MIBC	DYS	-1.875	1.95434	-0.9594	0.3374	-0.3074	-0.7848	0.34
MIBC	CIS	0.5625	2.20794	0.25476	0.7989	0.0426	-0.47	0.58
n.s.	P<0.05
Ad Supplementary Figure 3B
Gene Group A* Z-Score
Variable A	Variable B	Score Mean Difference	Std Err Dif	Z	P-Value	Hodges-Lehmann	Lower CL	Upper CL
U/HYP/DYS	CIS	-11.3438	3.0612	-3.70566	0.0002	-0.635	-0.79	-0.39
pT1	CIS	8.3819	2.45374	3.41599	0.0006	0.63	0.38	0.87
pT1	DYS	7.36111	2.35702	3.12305	0.0018	1.22	0.92	1.49
U/HYP/DYS	MIBC	-9.8438	3.3047	-2.97871	0.0029	-1.085	-1.35	-0.85
pT1	HYP	6.84444	2.33333	2.93333	0.0034	1.22	0.96	1.51
U	pT1	-6.84444	2.33333	-2.93333	0.0034	-1.25	-1.54	-1.01
HYP	CIS	-6.3375	2.22017	-2.85451	0.0043	-0.625	-0.83	-0.22
U	CIS	-6.3375	2.22017	-2.85451	0.0043	-0.675	-0.87	-0.28
DYS	CIS	-5.97917	2.25924	-2.64654	0.0081	-0.56	-0.87	-0.28
MIBC	CIS	5.8125	2.20408	2.63716	0.0084	0.45	0.18	0.93
MIBC	DYS	4.79167	1.94841	2.45927	0.0139	1.085	0.66	1.51
MIBC	HYP	4.275	1.82945	2.33677	0.0195	1.075	0.77	1.56
U	MIBC	-4.275	1.82945	-2.33677	0.0195	-1.12	-1.59	-0.84
pT1	MIBC	2.3472	2.33705	1.00435	0.3152	0.145	-0.26	0.55
U	HYP	-1.2	1.91485	-0.62668	0.5309	-0.05	-0.31	0.23
U	DYS	-0.36667	2.00375	-0.18299	0.8548	-0.055	-0.39	0.24
HYP	DYS	0	2.00832	0	1	0.005	-0.31	0.31
U/HYP/DYS	pT1	-12.4132	3.06599	-4.04867	<.0001	-1.23	-1.41	-1.06
n.s.	P<0.05
Gene Group B* Z-Score
Variable A	Variable B	Score Mean Difference	Std Err Dif	Z	P-Value	Hodges-Lehmann	Lower CL	Upper CL
U/HYP/DYS	pT1	8.94097	3.06422	2.91786	0.0035	0.993858	0.43812	1.46165
U	pT1	5.6	2.33333	2.4	0.0164	1.10505	0.41561	1.96473
pT1	CIS	-5.43056	2.45223	-2.21453	0.0268	-0.69855	-1.35063	-0.0345
pT1	DYS	-4.86111	2.35702	-2.06239	0.0392	-1.03253	-2.0966	0.06987
pT1	HYP	-4.66667	2.32305	-2.00885	0.0446	-0.85968	-1.3336	0
pT1	MIBC	-3.79167	2.34027	-1.62019	0.1052	-0.62523	-1.77968	0.40495
U	MIBC	2.475	1.83712	1.34722	0.1779	0.45095	-1.06125	1.50999
U/HYP/DYS	MIBC	3.59375	3.30595	1.08706	0.277	0.401384	-0.65319	1.30477
U	CIS	2.1125	2.22017	0.9515	0.3413	0.38592	-0.63093	1.23633
U	HYP	1.6	1.90904	0.83812	0.402	0.46499	-0.56389	1.10505
U/HYP/DYS	CIS	2.53125	3.0592	0.82742	0.408	0.261012	-0.3431	0.84382
MIBC	DYS	-1.45833	1.95434	-0.7462	0.4555	-0.40977	-1.78071	0.99578
HYP	DYS	-1.28333	2.00375	-0.64047	0.5219	-0.23265	-1.45076	0.98315
DYS	CIS	1.3125	2.25924	0.58095	0.5613	0.25253	-0.98315	1.32372
MIBC	HYP	-0.675	1.82945	-0.36896	0.7122	-0.30443	-0.87887	1.04605
HYP	CIS	0.4875	2.20794	0.22079	0.8253	0.14844	-0.84036	0.68416
MIBC	CIS	-0.1875	2.20794	-0.08492	0.9323	-0.10593	-1.72335	1.18152
U	DYS	0	2.00832	0	1	-0.02988	-1.33117	1.44814
n.s.	P<0.05
Gene Group C* Z-Score
Variable A	Variable B	Score Mean Difference	Std Err Dif	Z	P-Value	Hodges-Lehmann	Lower CL	Upper CL
U/HYP/DYS	pT1	10.1563	3.06658	3.31191	0.0009	1.08657	0.55501	1.51663
U	pT1	6.53333	2.33333	2.8	0.0051	1.27334	0.55501	1.79993
pT1	HYP	-6.22222	2.33333	-2.66667	0.0077	-1.03941	-1.60411	-0.35819
U/HYP/DYS	MIBC	8.5938	3.30719	2.59851	0.0094	1.24373	0.37357	1.89406
U/HYP/DYS	CIS	7.4063	3.06186	2.41887	0.0156	0.73972	0.21294	1.26331
U	CIS	5.0375	2.22017	2.26897	0.0233	0.82995	0.21294	1.54738
U	MIBC	3.825	1.83712	2.08207	0.0373	1.43787	-0.13624	2.1864
MIBC	HYP	-3.825	1.83712	-2.08207	0.0373	-1.26696	-2.08595	0.21931
MIBC	DYS	-3.95833	1.95434	-2.02541	0.0428	-0.97236	-2.17574	0.57506
HYP	CIS	4.3875	2.22017	1.9762	0.0481	0.76811	-0.00041	1.2946
pT1	DYS	-4.58333	2.35702	-1.94454	0.0518	-0.95055	-1.75558	0.05693
MIBC	CIS	-3.1875	2.20794	-1.44365	0.1488	-0.4905	-1.43692	0.45591
pT1	CIS	-3.42361	2.45374	-1.39526	0.1629	-0.30938	-0.90164	0.26865
DYS	CIS	2.77083	2.25924	1.22644	0.22	0.51802	-0.31078	1.49261
U	HYP	1.6	1.91485	0.83557	0.4034	0.10045	-0.78725	1.06813
pT1	MIBC	1.26389	2.34027	0.54006	0.5892	0.22884	-0.75978	0.97088
U	DYS	0.55	2.00832	0.27386	0.7842	0.09151	-0.93871	1.51197
HYP	DYS	0	2.00832	0	1	-0.02678	-1.02178	1.31415
n.s.	P<0.05
Gene Group D* Z-Score
Variable A	Variable B	Score Mean Difference	Std Err Dif	Z	P-Value	Hodges-Lehmann	Lower CL	Upper CL
U/HYP/DYS	CIS	10.5938	3.0612	3.46066	0.0005	0.69745	0.34189	0.91273
pT1	CIS	-8.1458	2.45223	-3.3218	0.0009	-0.85215	-1.19691	-0.53529
pT1	DYS	-7.36111	2.35702	-3.12305	0.0018	-1.4338	-1.82112	-1.06121
U/HYP/DYS	MIBC	9.8438	3.30719	2.97647	0.0029	1.93828	1.54312	2.2201
U	pT1	6.84444	2.33333	2.93333	0.0034	1.51587	1.19387	1.95128
pT1	HYP	-6.84444	2.33333	-2.93333	0.0034	-1.63576	-2.05526	-1.23875
DYS	CIS	5.97917	2.25676	2.64945	0.0081	0.56092	0.22107	0.88091
MIBC	CIS	-5.8125	2.20408	-2.63716	0.0084	-1.21316	-1.73781	-0.77293
HYP	CIS	5.6875	2.21712	2.56526	0.0103	0.81971	0.25279	1.14742
U	CIS	5.6875	2.21712	2.56526	0.0103	0.7277	0.27673	1.05677
MIBC	DYS	-4.79167	1.95434	-2.45181	0.0142	-1.8057	-2.21384	-1.43741
U	MIBC	4.275	1.83712	2.32702	0.02	1.97467	1.49837	2.35171
MIBC	HYP	-4.275	1.83712	-2.32702	0.02	-2.08794	-2.50367	-1.31947
pT1	MIBC	4.875	2.34027	2.0831	0.0372	0.36049	-0.01649	0.82447
HYP	DYS	3.11667	2.00832	1.55188	0.1207	0.25032	-0.43947	0.64216
U	DYS	2.38333	2.00832	1.18673	0.2353	0.09967	-0.37778	0.55337
U	HYP	-1.2	1.91485	-0.62668	0.5309	-0.06503	-0.62545	0.64095
U/HYP/DYS	pT1	12.4132	3.06658	4.04789	<.0001	1.52055	1.2535	1.8497
n.s.	P<0.05
